# Supplementary material for: Single Circulating-Tumor-Cell-Targeted Sequencing to Identify Somatic Variants in Liquid Biopsies in Non-Small-Cell Lung Cancer Patients
Source: MDPI journal article supplement (doi:10.3390/cimb44020052), 2022-02-02
Supplement: s1 [file s1]

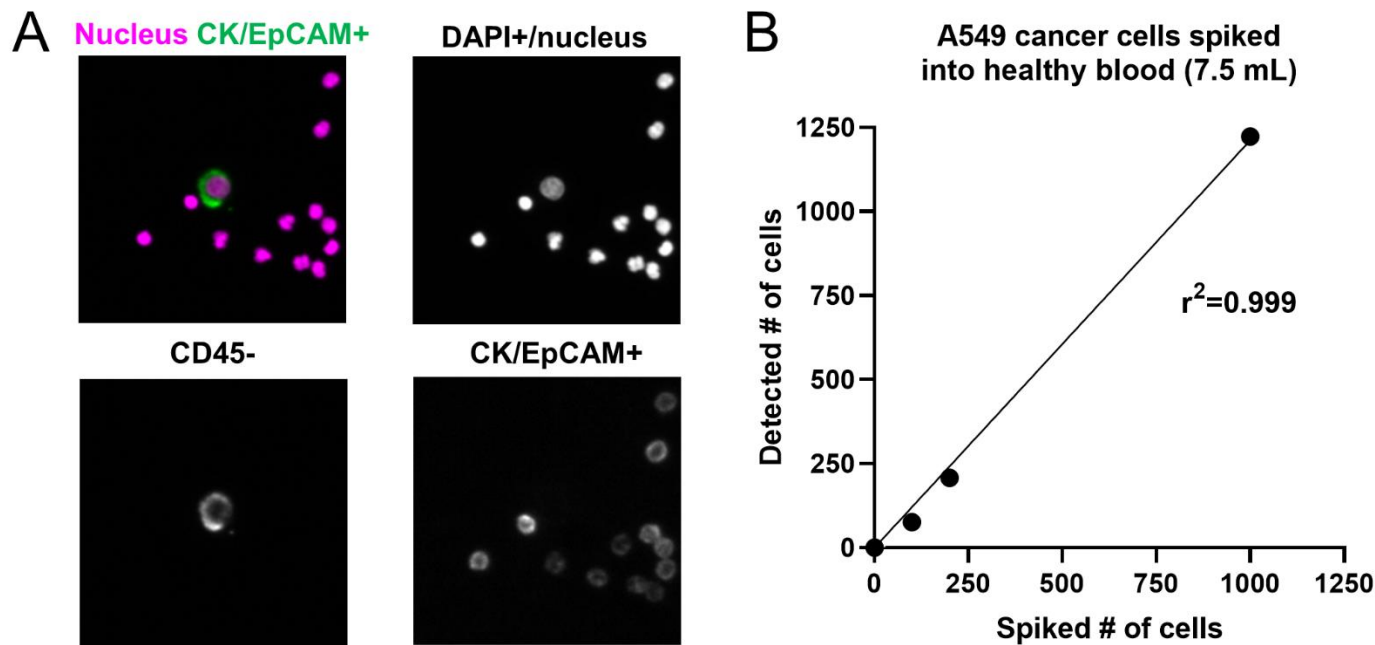

**Figure S1.** Validation of the CTC detection technology with A549 lung cancer cell-line spiking experiments. (A) Representative 4-channel fluorescent images of single human lung cancer cells (A549) that were spiked into healthy human blood for validation of the applied CTC technology. (B) Linear regression analysis demonstrating correlation of spiked versus detected lung cancer cell numbers (spiked = 0, detected = 0; 100, 76; 200, 208; 1000, 1223).

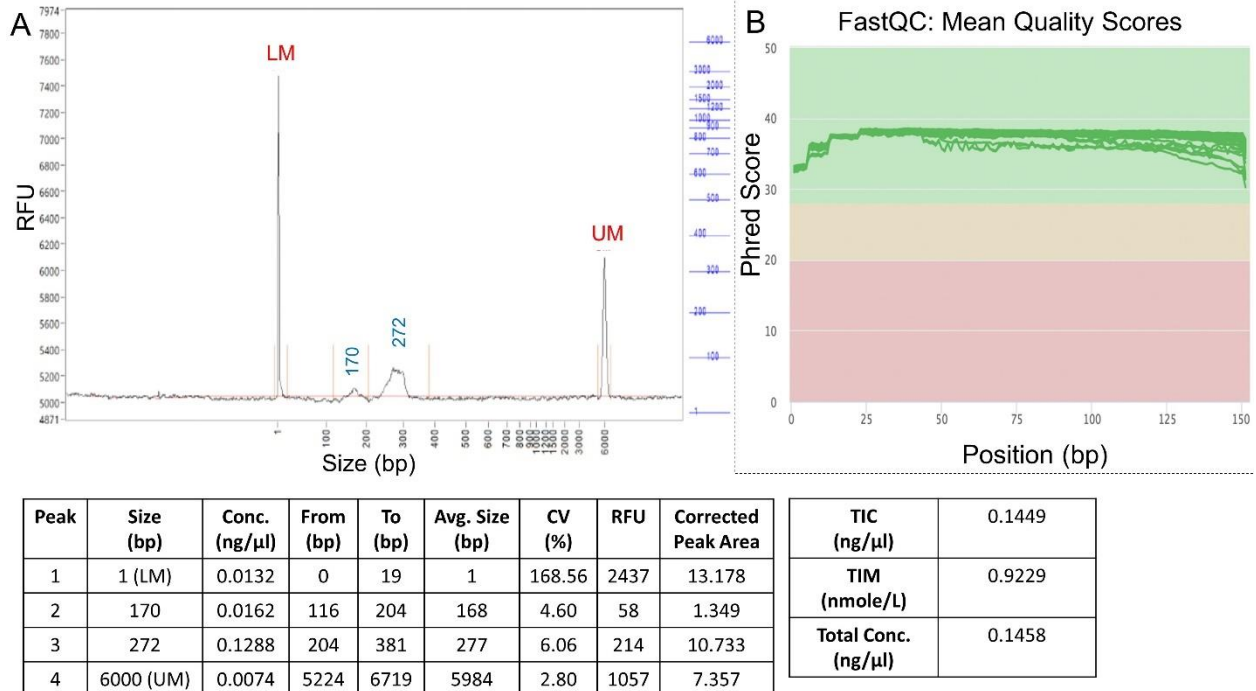

**Figure S2.** Quality control (QC) analysis of the pooled library and the generated sequences. (A): DNA concentrations and fragment sizes of the pooled library. (B): FASTQC and MultiQC of the generated FASTQ files. (bp: pair of bases, 170 bp: Primer dimers, 272 bp: Pooled libraries amplicon).
